# Supplementary material for: The Influence of Above-Ground Herbivory on the Response of Arctic Soil Methanotrophs to Increasing CH4 Concentrations and Temperatures
Source: MDPI journal article supplement (doi:10.3390/microorganisms9102080), 2021-10-02
Supplement: s1 [file s1]

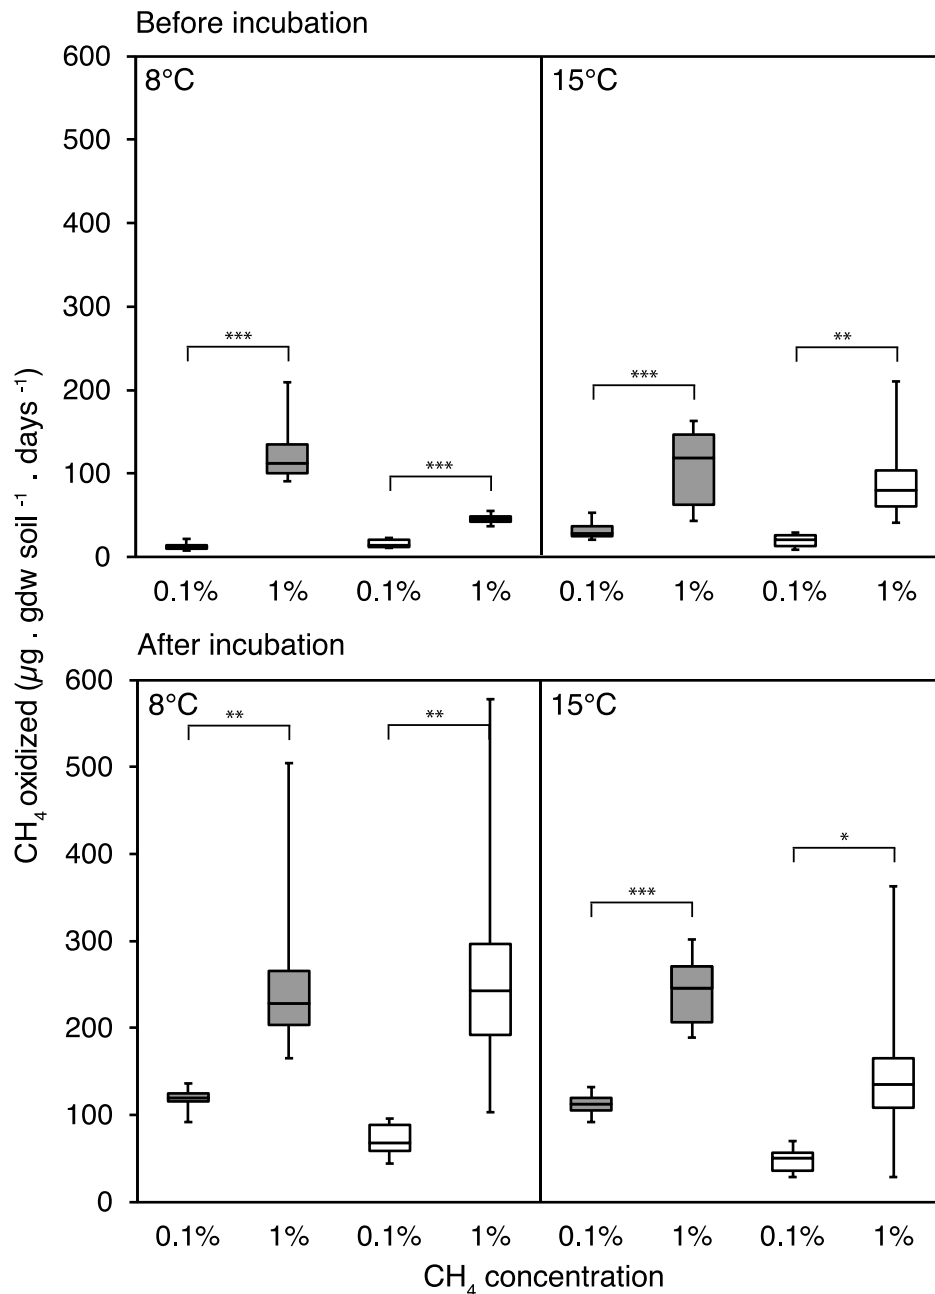

**Supplementary Figure S1.** CH<sub>4</sub> oxidation rates from Exp II emphasizing the comparison between 0.1% and 1% headspace CH<sub>4</sub> concentrations. Results are shown for measurements collected before (top) and after (bottom) the three-week incubation, and at 8 (left) and 15 °C (right). Grazed microcosms are shown in gray; exclosed microcosms in white. Comparison using linear mixed models with peat blocks as random variables shows significant differences in the CH<sub>4</sub> oxidation rates between CH<sub>4</sub> concentrations (\*p < 0.05; \*\* p < 0.01; \*\*\* p < 0.001).

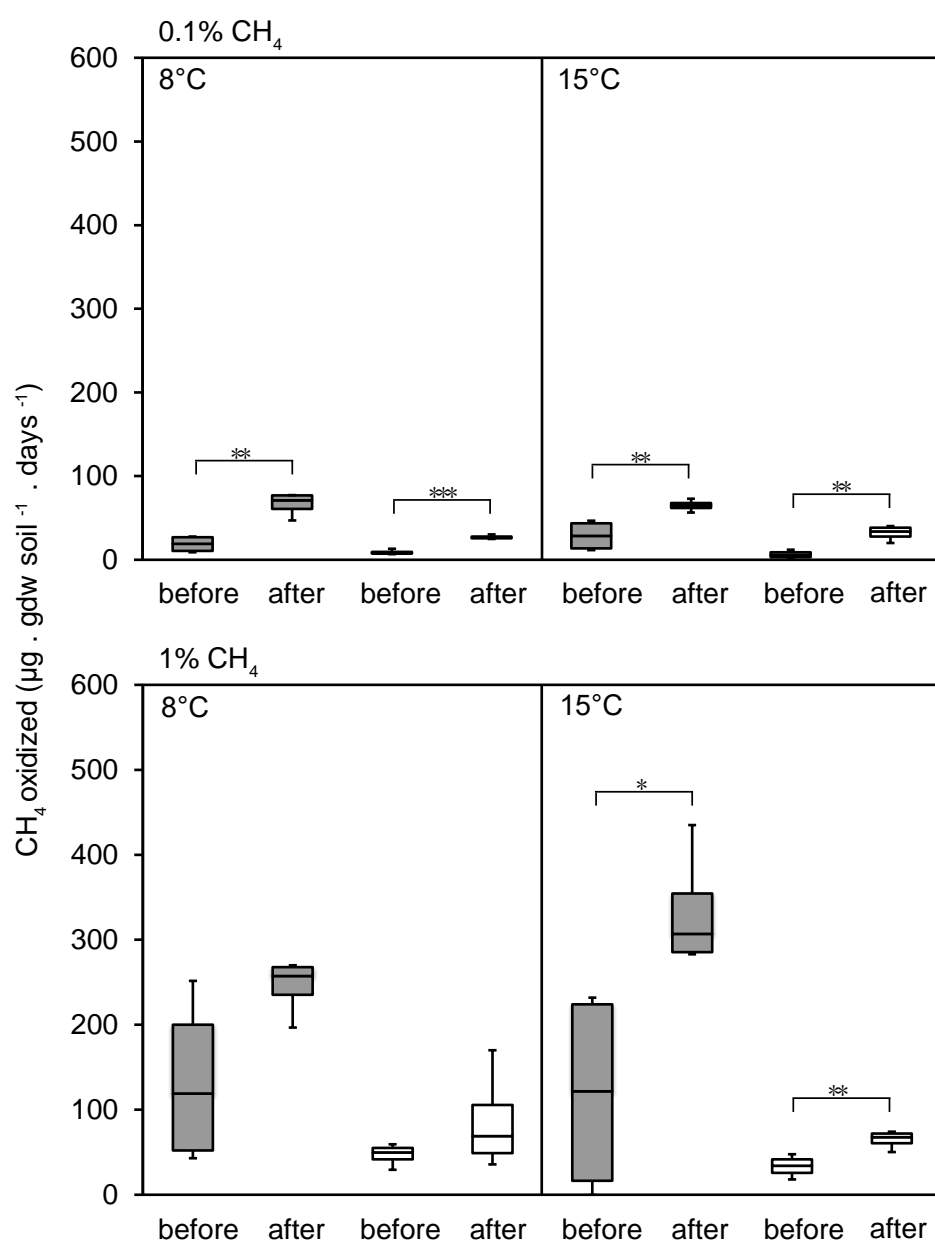

**Supplementary Figure S2.** CH<sub>4</sub> oxidation rates from Exp I before and after the three-week incubation, at 8 °C (left) and 15 °C (right) and 0.1% (top) and 1% CH<sub>4</sub> headspace concentrations (bottom). Grazed peat soil microcosms are shown in gray; exclosed peat soil microcosms in white. Comparison using linear mixed models with peat blocks as random variables shows significant differences in the CH<sub>4</sub> oxidation rates before and after the incubation (\*p < 0.05; \*\* p < 0.01; \*\*\* p < 0.001).

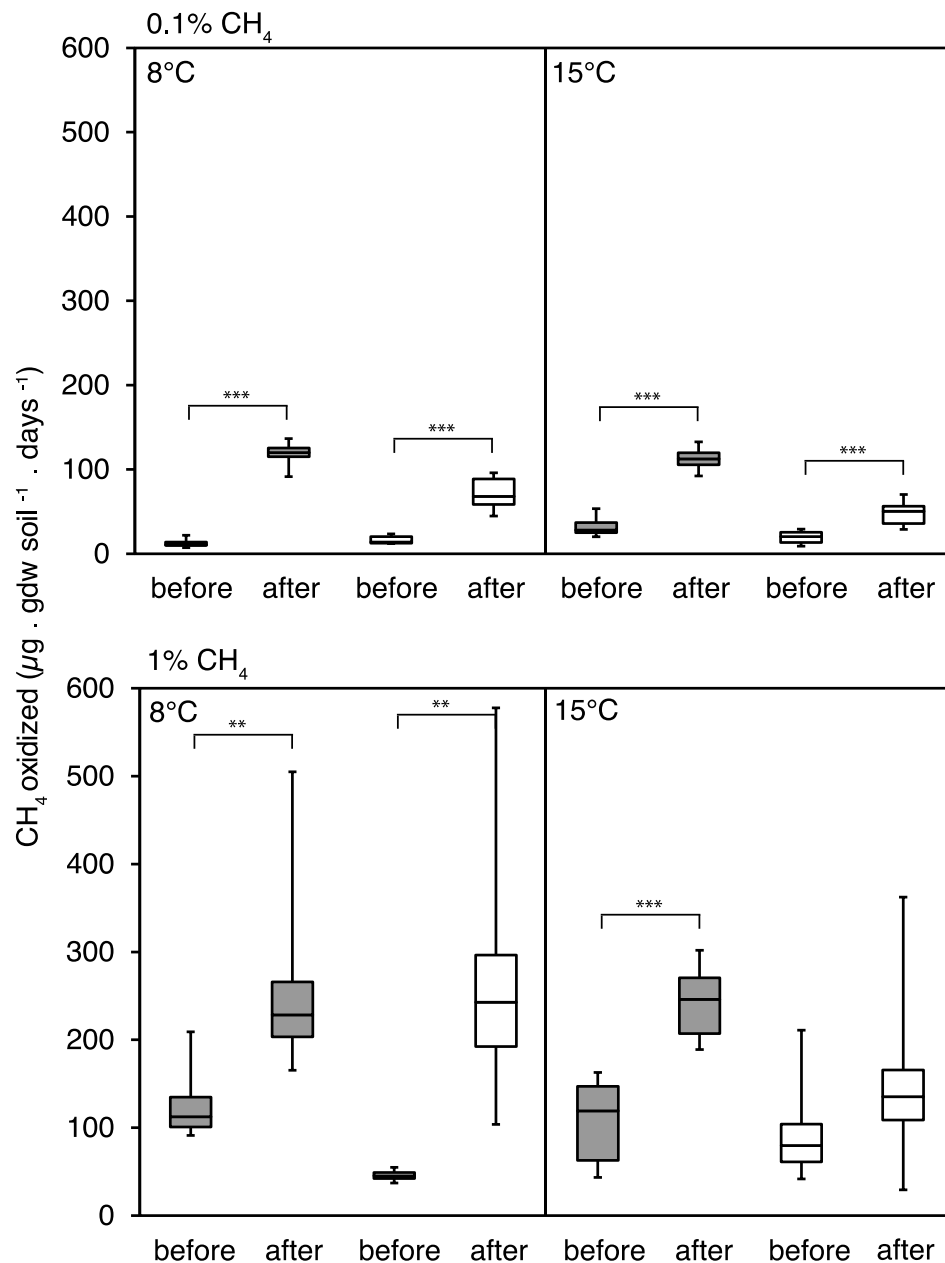

**Supplementary Figure S3.** CH<sub>4</sub> oxidation rates from Exp II before and after the three-week incubation at 8°C (left) and 15°C (right) and 0.1% (top) and 1% CH<sub>4</sub> headspace concentrations (bottom). Grazed peat soil microcosms are shown in gray; excluded peat soil microcosms in white. Comparison using linear mixed models with peat blocks as random variables shows significant differences in the CH<sub>4</sub> oxidation before and after the incubation (\* p < 0.05; \*\* p < 0.01; \*\*\* p < 0.001).

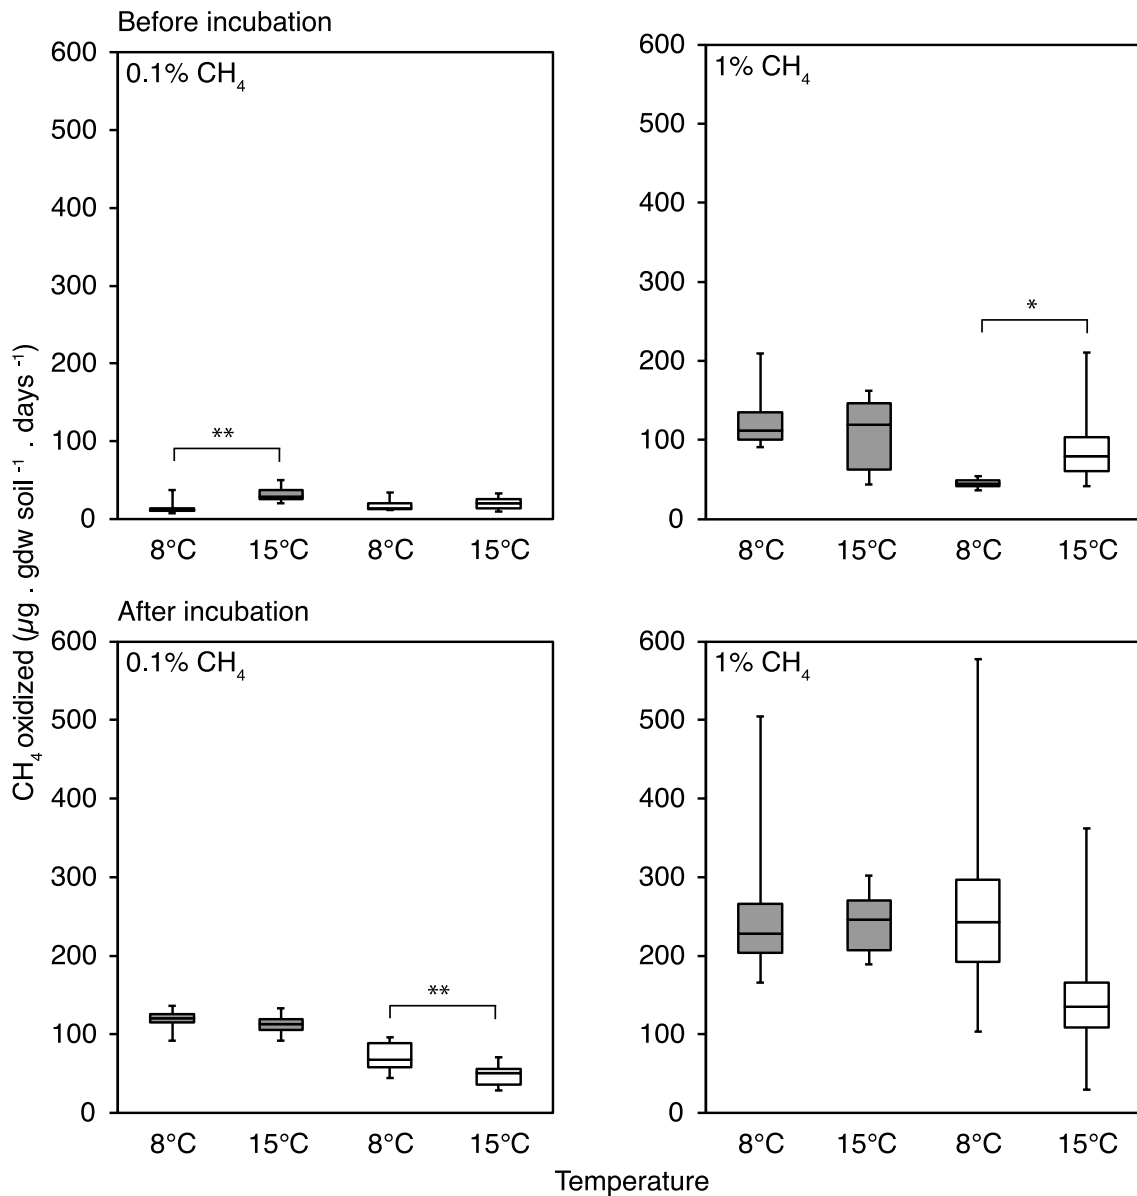

**Supplementary Figure S4.** CH<sub>4</sub> oxidation rates from Exp II emphasizing the comparison between 8 °C and 15 °C. Results are shown for measurements collected before (top) and after (bottom) the three-week incubation, and at 0.1% (left) and 1% CH<sub>4</sub> (right). Grazed microcosms are shown in gray; exclosed microcosms in white. Comparison using linear mixed models with peat blocks as random variables shows significant differences in the CH<sub>4</sub> oxidation rates between temperatures (\* p < 0.05; \*\* p < 0.01).

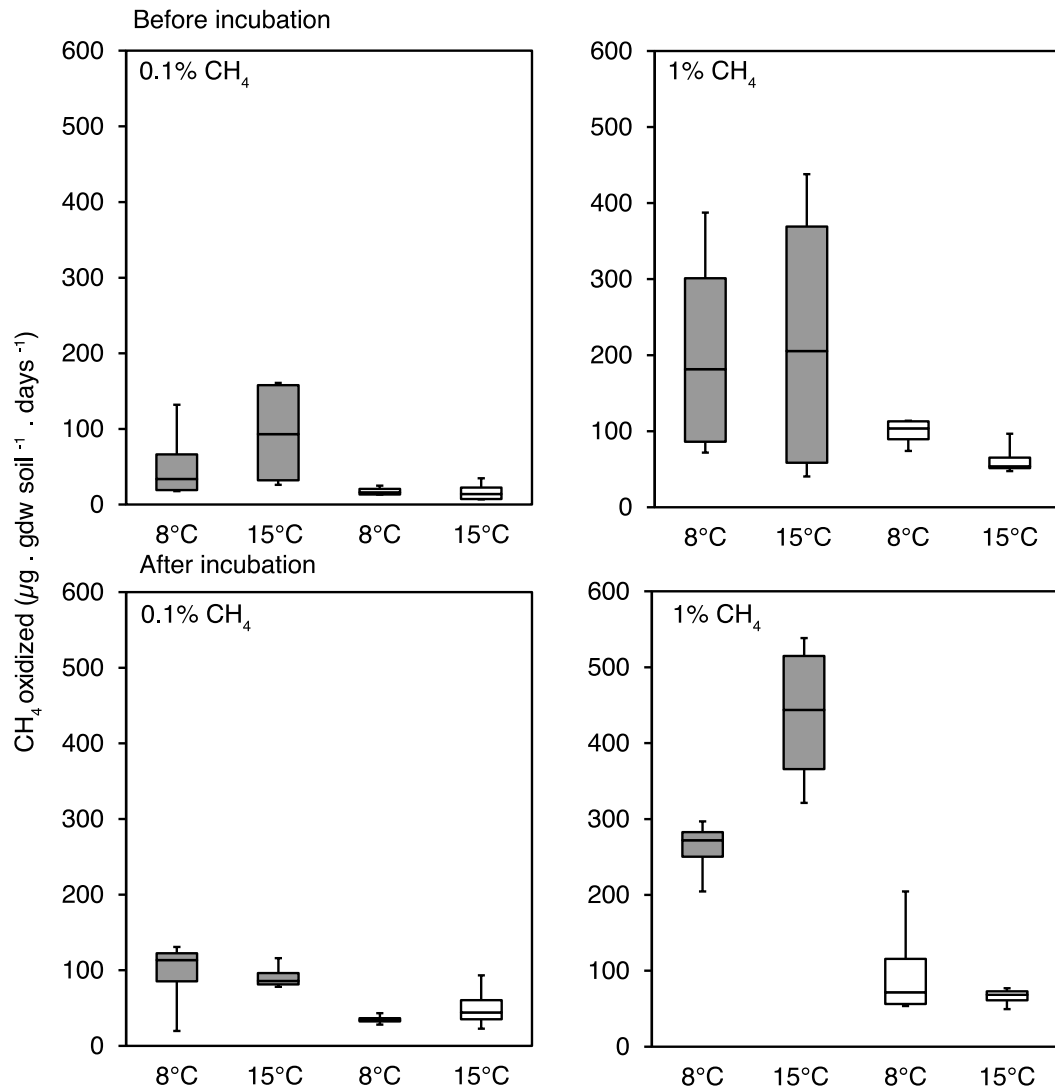

**Supplementary Figure S5.** CH<sub>4</sub> oxidation rates from Exp I emphasizing the comparison between 8 °C and 15 °C. Results are shown for measurements collected before (top) and after (bottom) the three-week incubation, and at 0.1% (left) and 1% CH<sub>4</sub> (right). The CH<sub>4</sub> oxidation rates presented here are corrected for the different amounts of CH<sub>4</sub> dissolved at 8 °C and 15 °C. Grazed microcosms are shown in gray; exclosed microcosms in white. Comparison using linear mixed models with peat blocks as random variables shows significant differences in the CH<sub>4</sub> oxidation rates between temperatures (\* p < 0.05).

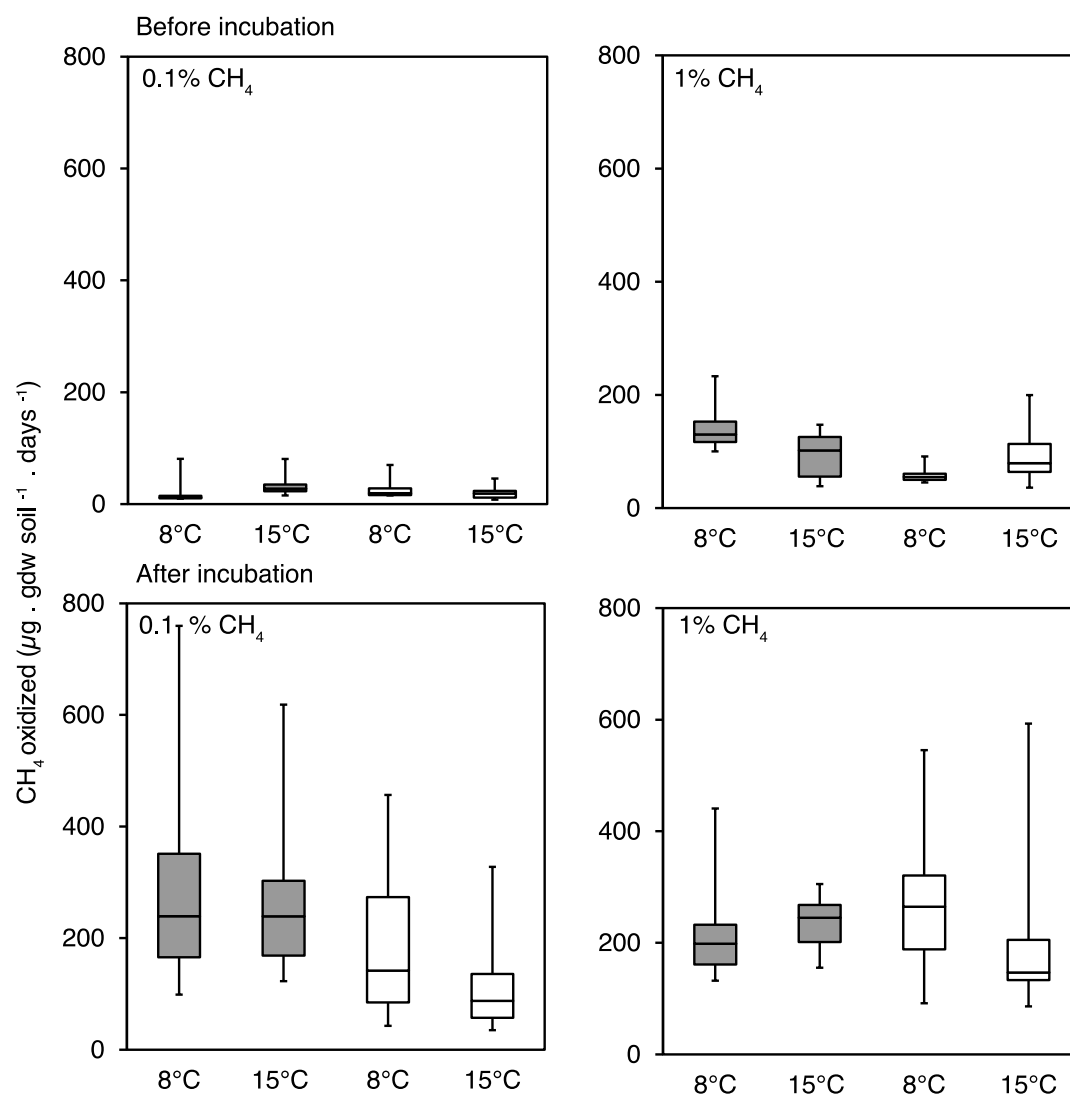

**Supplementary Figure S6.** CH<sub>4</sub> oxidation rates from Exp II emphasizing the comparison between 8 °C and 15 °C. Results are shown for measurements collected before (top) and after (bottom) the three-week incubation, and at 0.1% (left) and 1% CH<sub>4</sub> (right). The CH<sub>4</sub> oxidation rates presented here are corrected for the different amounts of CH<sub>4</sub> dissolved at 8 °C and 15 °C. Grazed microcosms are shown in gray; exclosed microcosms in white. Comparison using linear mixed models with peat blocks as random variables shows significant differences in the CH<sub>4</sub> oxidation between temperatures (\* p < 0.05; \*\* p < 0.01).

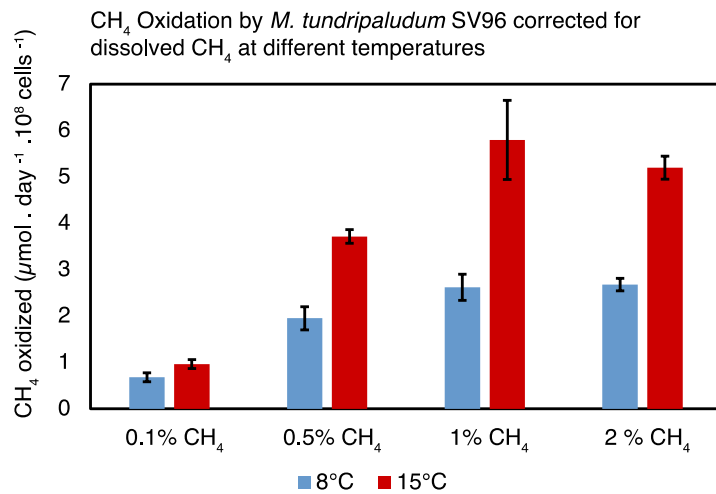

**Supplementary Figure S7.** CH<sub>4</sub> oxidation per cell for *Methylobacter tundripaludum* SV96 at 8 °C (blue) and 15 °C (red), with CH<sub>4</sub> headspace concentrations ranging from 0.1to 2%. The CH<sub>4</sub> oxidation rates have been corrected for the amount of CH<sub>4</sub> dissolved at 8 °C and 15 °C.

**Supplementary Table S1.** Number of sequences and OTUs at the different stages of the bioinformatic pipeline.

| Pipeline step      | Sequences |         | OTUs  |      |
|--------------------|-----------|---------|-------|------|
| primer set         | mb661     | A682    | mb661 | A682 |
| merging            | 2068297   | 1033135 | ---   | ---  |
| quality check      | 1270623   | 438874  | ---   | ---  |
| trimming           | 1240464   | 426302  | ---   | ---  |
| chimera removal    | 1162251   | 422389  | ---   | ---  |
| frameshift removal | 1096123   | 394153  | ---   | ---  |
| clustering         | 1096121   | 394153  | 11641 | 5075 |
| length selection   | 1096106   | 393547  | 11631 | 4952 |

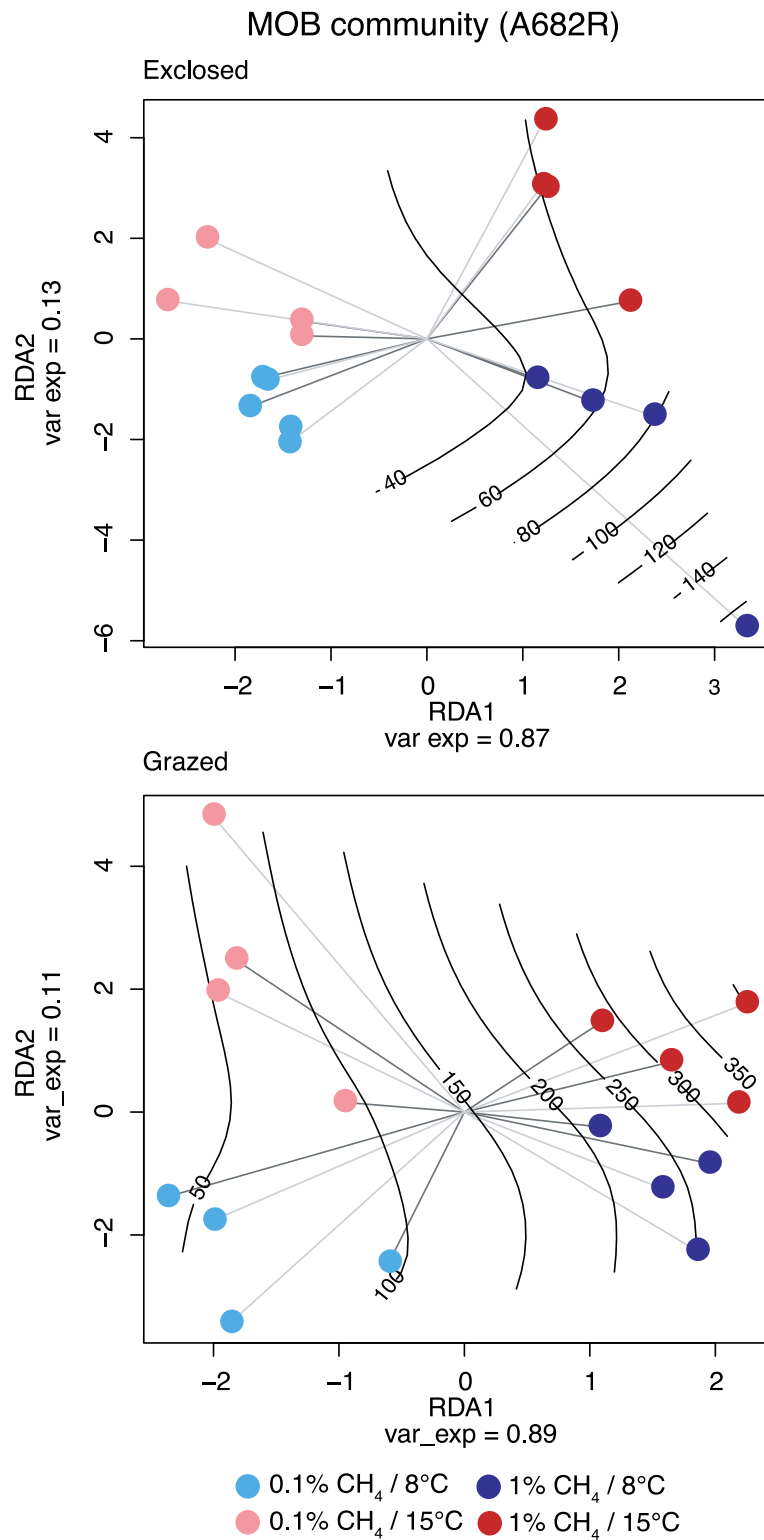

**Supplementary Figure S8.** Redundancy analysis of the effect of CH<sub>4</sub> concentration and temperature on the MOB communities after incubation (*pmoA* transcripts using the A189F/A682R primer pair). The effect of CH<sub>4</sub> concentration and temperature was corrected according to the peat block replicates (represented by gray shaded lines). Samples are labeled according to CH<sub>4</sub> concentration (light colors — 0.1% CH<sub>4</sub>, dark colors — 1%CH<sub>4</sub>) and temperature (blue — 8 °C and red — 15 °C). The black lines indicate a projection of the measured CH<sub>4</sub> oxidation rates (μg of CH<sub>4</sub> oxidized per gram dry soil and day).



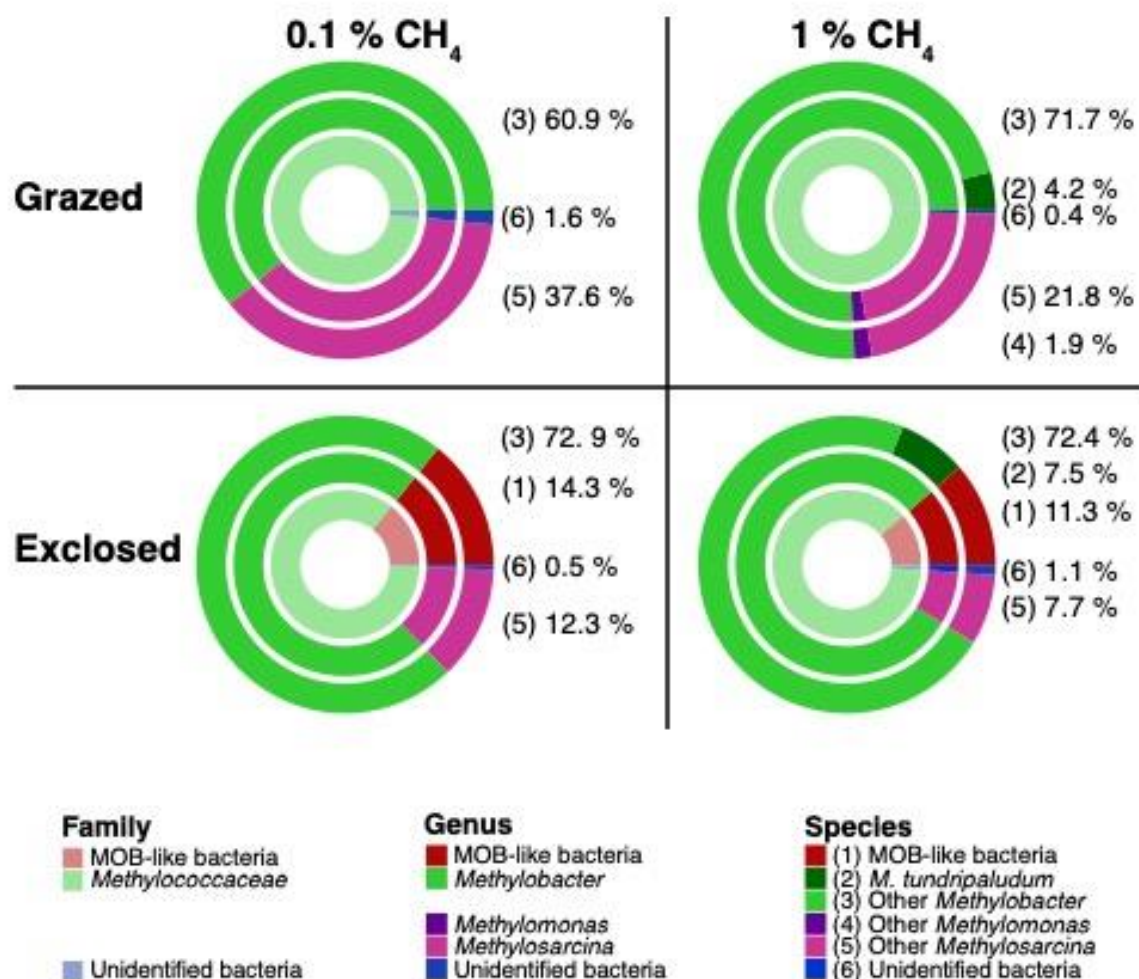

**Supplementary Figure S9.** Distribution of MOB taxa (A189F/A682R primer set) in grazed and exclosed peat soils after incubation at 0.1% CH<sub>4</sub> and at 1% CH<sub>4</sub> (16 soil samples per concentration and 16 soil samples per grazing condition). As temperature had no significant effect on the MOB community, these 16 samples include both the 8 °C and 15 °C incubations. Taxa with a relative abundance of > 1% are represented at the full taxonomic resolution, whereas those taxa not reaching the 1% threshold were added to their broader taxonomic group, one level lower in taxonomic resolution. The different rings represent different taxonomic levels from family to genus to species moving from the innermost ring outward. Relative abundances for the species level are given in %.

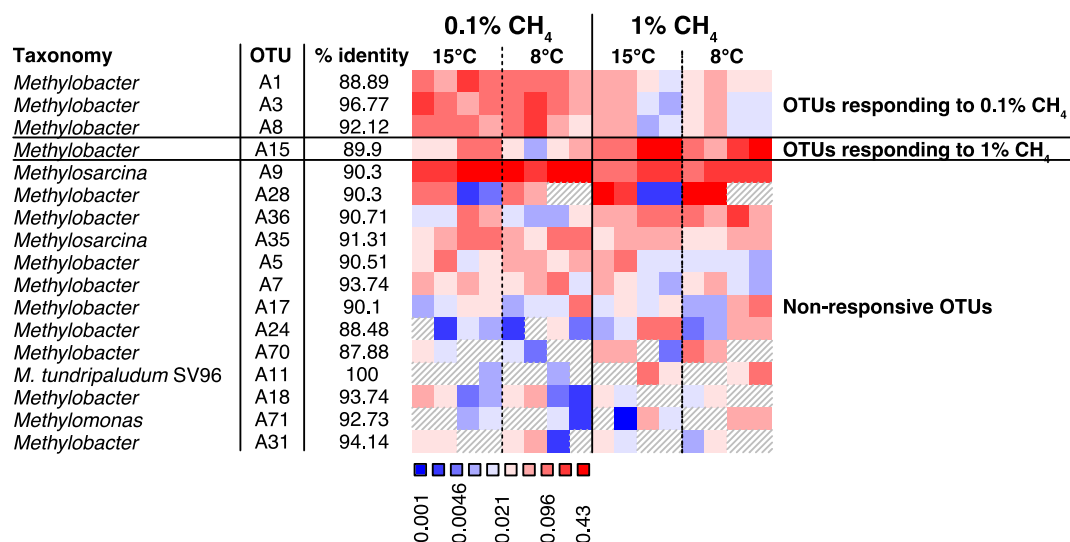

**Supplementary Figure S10.** Relative abundances of *pmoA* transcripts representing MOB OTUs (A189F/A682R primer pair) from grazed peat soil microcosms after incubation at 0.1% and 1% CH<sub>4</sub> concentrations. OTUs with higher relative abundance at 0.1% CH<sub>4</sub> are shown in the first block (left) and those with higher relative abundance at 1% CH<sub>4</sub> in the second block (right). The non-responsive OTUs with the highest relative abundance are shown in the third block. The number of OTUs included in the figure make up 90% of the total MOB community transcription. OTUs are identified as the letter A (indicating that these are part of the A682R dataset) and a number. The percentage of identity between the OTUs and the best hit in the database is given next to the OTU identification. Relative abundances reach from low abundances (blue) to high (red).

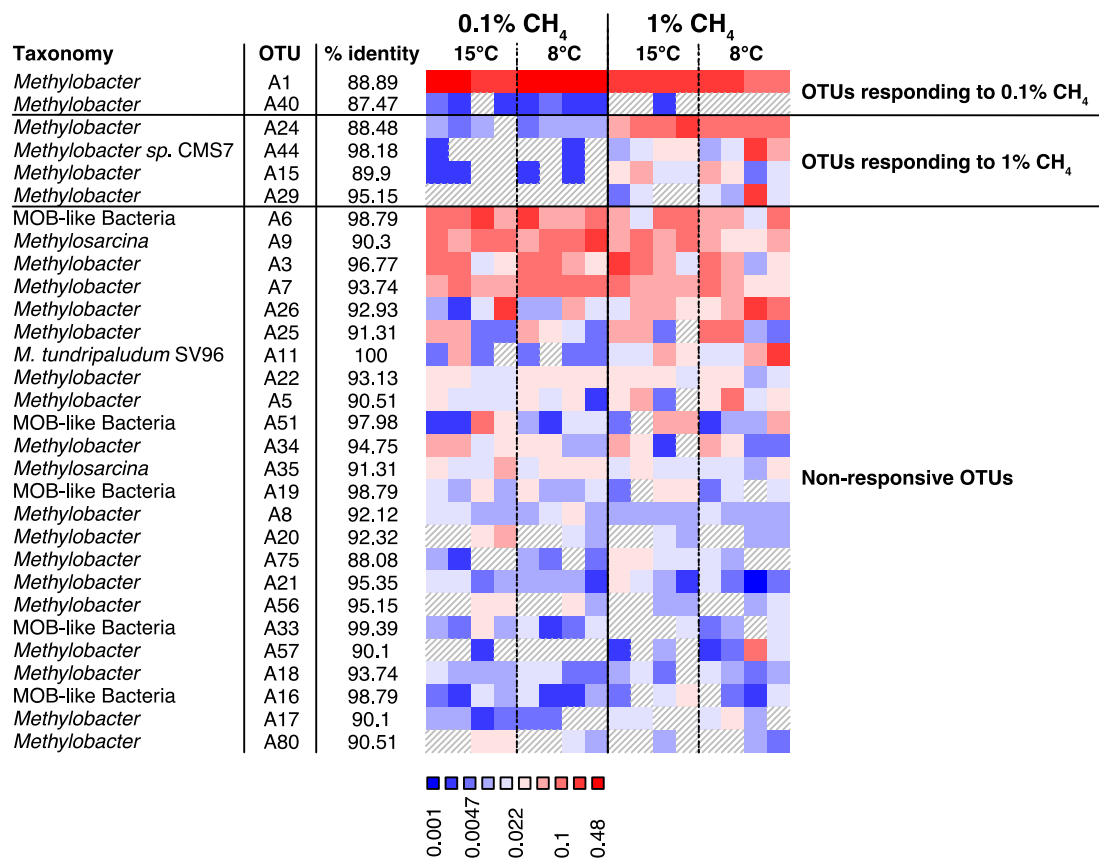

**Supplementary Figure S11.** Relative abundances of *pmoA* transcripts representing MOB OTUs (A189F/A682R primer pair) from exclosed peat soil microcosms after incubation at 0.1% and 1% CH<sub>4</sub> concentration. OTUs with higher relative abundance at 0.1% CH<sub>4</sub> are shown in the first block (left) and those with higher relative abundance at 1% CH<sub>4</sub> in the second block (right). The non-responsive OTUs with the highest relative abundance are shown in the third block. The number of OTUs included in the figure make up 90% of the total MOB community transcription. OTUs are identified as the letter A (indicating that these are part of the A682R dataset) and a number. The percentage of identity between the OTU and the best hit in the database is given next to the OTU identification. Relative abundances reach from low abundances (blue) to high (red).

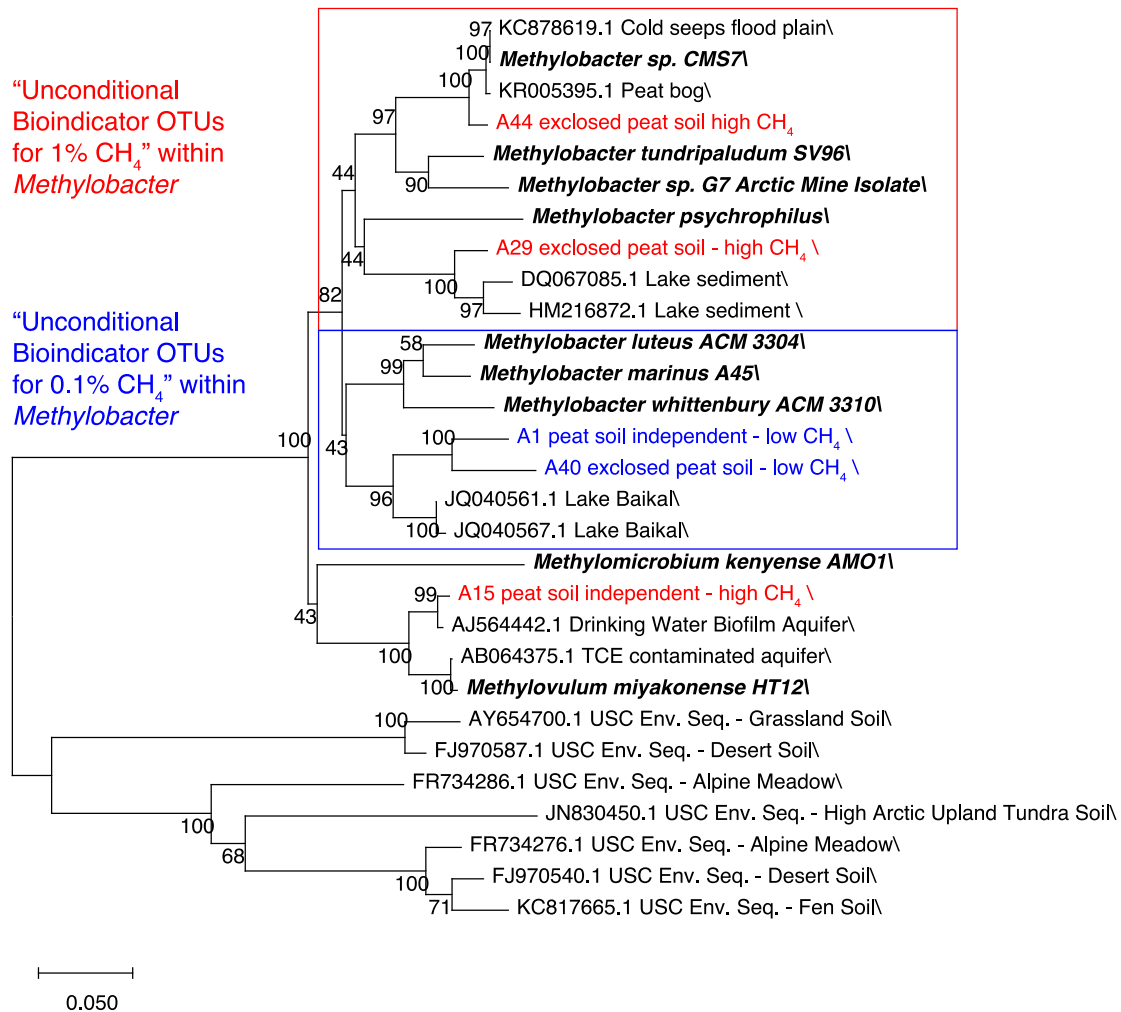

**Supplementary Figure S12.** Phylogenetic representation of the “unconditional bioindicator OTUs” for 0.1% CH<sub>4</sub> (blue) and 1% CH<sub>4</sub> (red) incubations, cultivated MOB (bold, italic) and closely related environmental sequences retrieved from the NCBI GenBank. All OTUs included were identified as bioindicators both in the grazed and the exclosed peat soil microcosms, or in only one of the soil types, being absent from the other soil type. The first type is called “peat soil independent”. The other type of OTUs, which were specifically assigned as bioindicators for one of the peat soil types, are labeled as either grazed or exclosed. The tree is based on a 452 nucleotide alignment, using the neighbor-joining method with the Jukes-cantor correction and 500 bootstraps. The length of the branches is based on a scale of 0.05 changes per nucleotide.
